# Supplementary material
Source: PubMed Central journal article supplement (PMC4640969)
Supplement: NIHMS707124-supplement-01.pdf [file NIHMS707124-supplement-01.pdf]

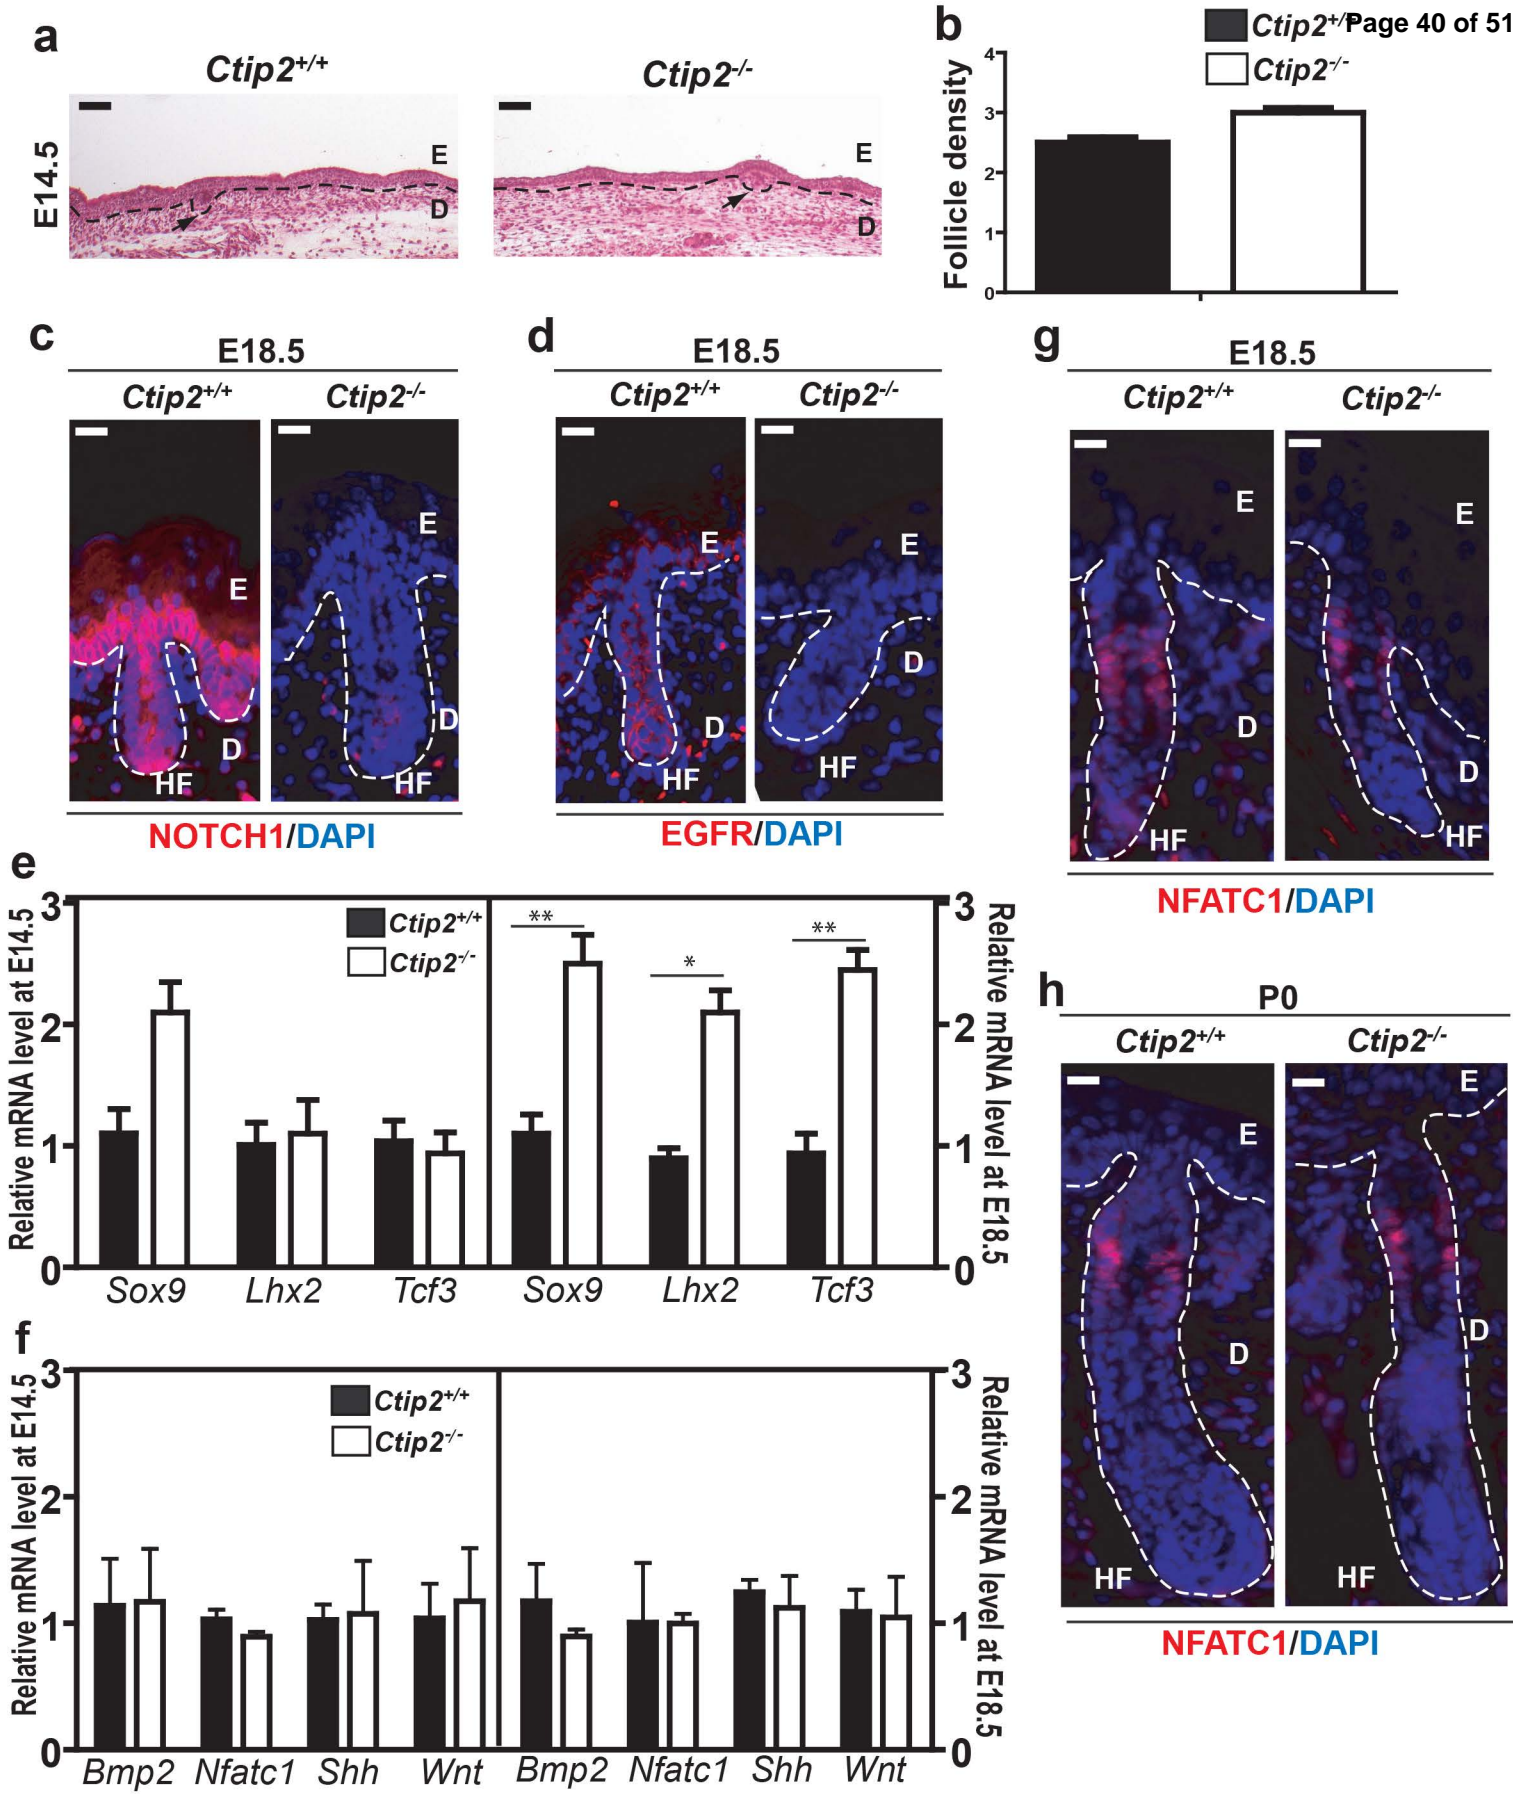

Supplementary Figure 1. Histological analysis and expression of factors involved in HF morphogenesis in *Ctip2*-null skin

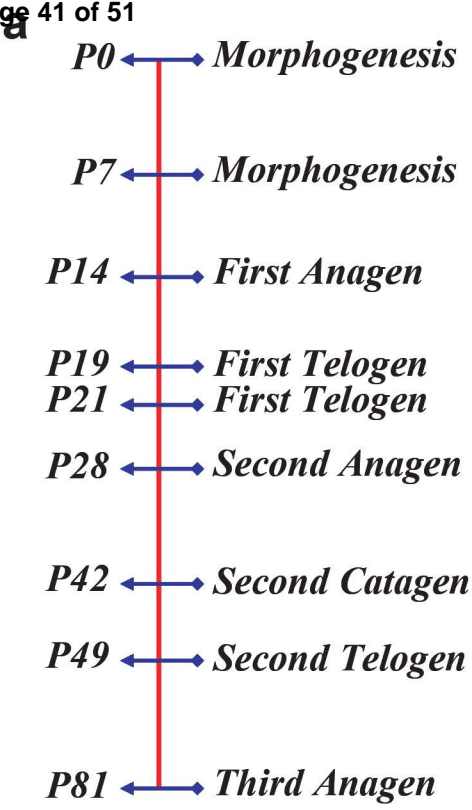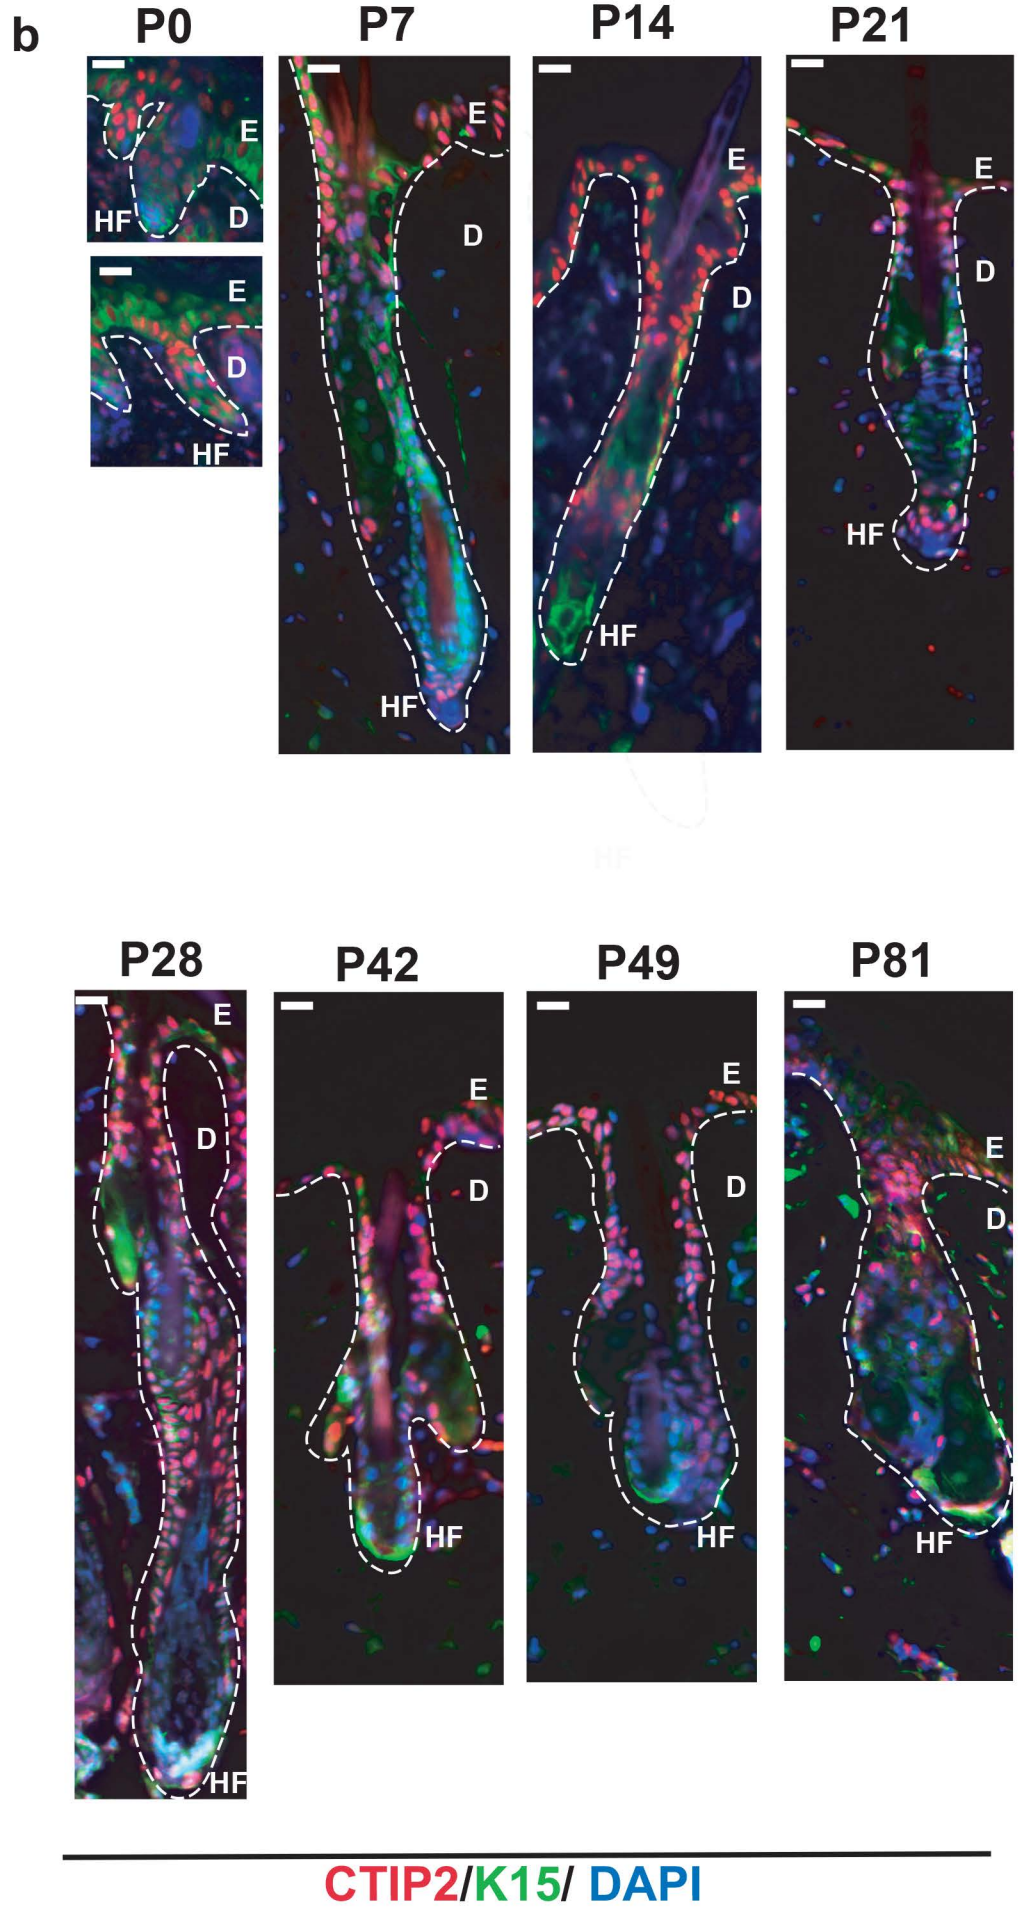

Supplementary Figure 2. CTIP2 expression during follicular morphogenesis and hair cycling

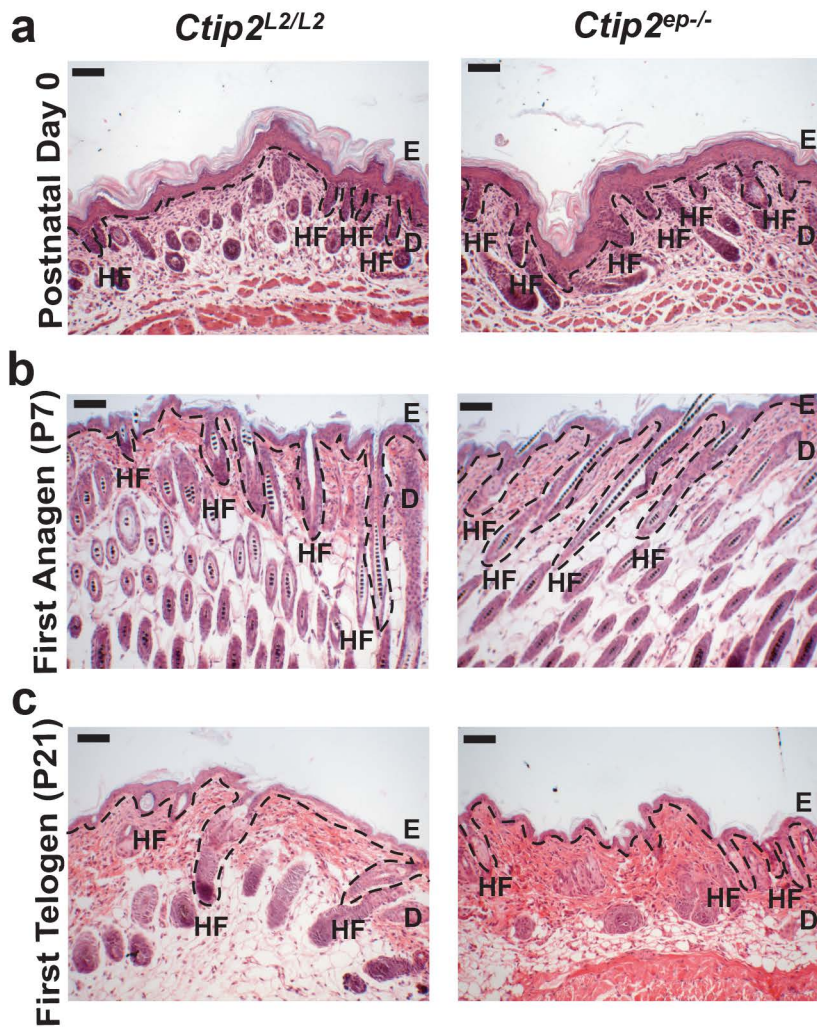

Supplementary Figure 3. Hair follicle defects were not observed during follicular establishment and during first hair cycling phase in *Ctip2*<sup>ep-/-</sup> mice

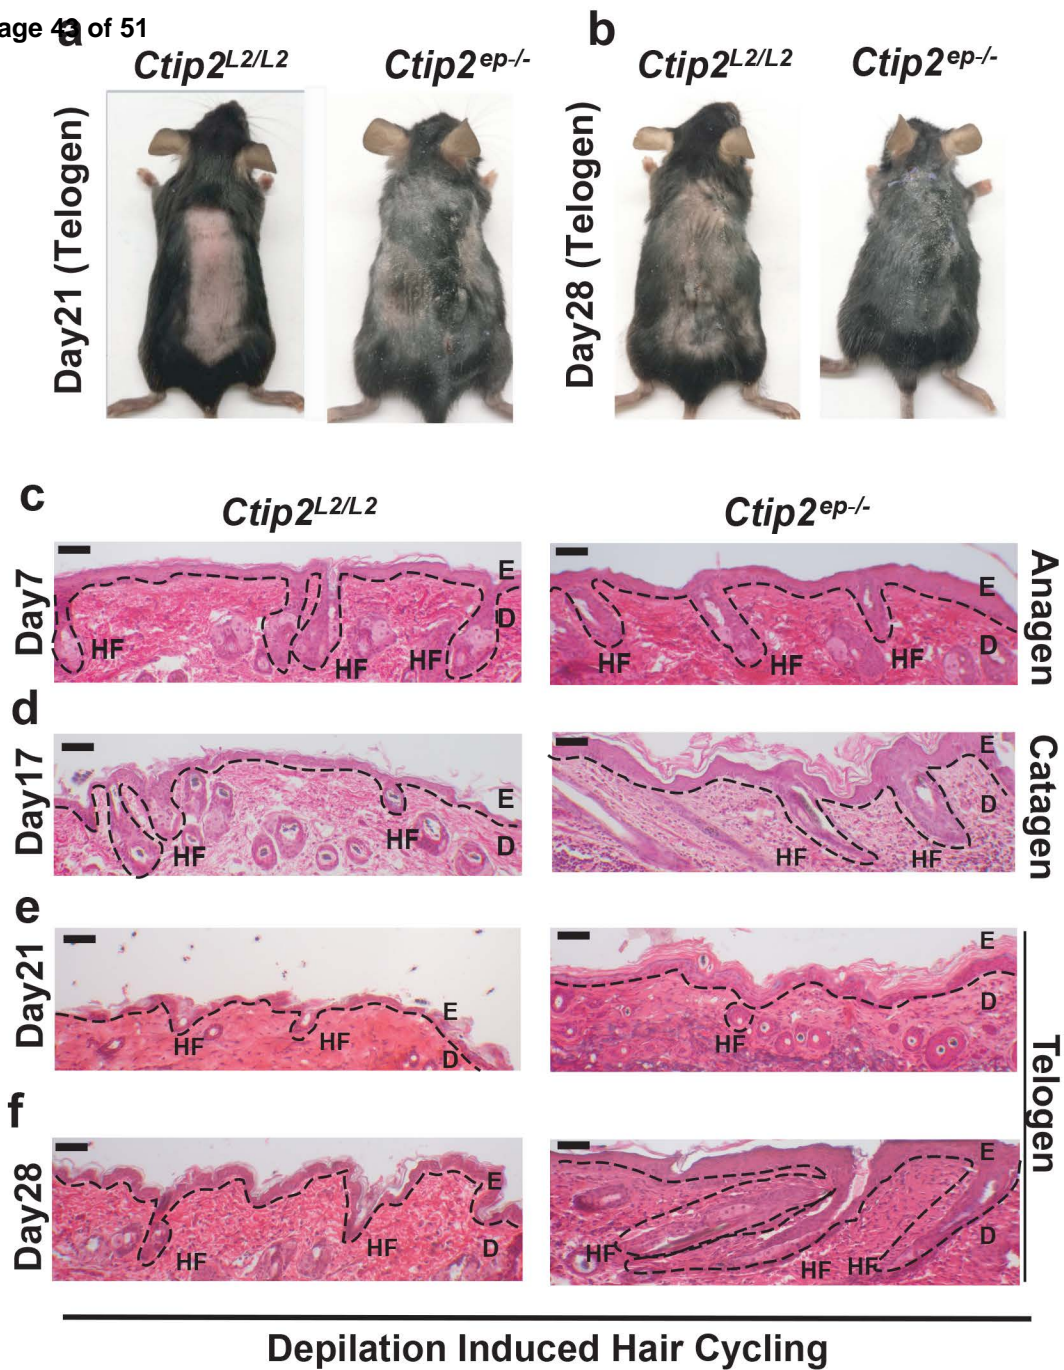

Supplementary Figure 4. *Ctip2* has a role in depilation induced hair cycling in adult mice

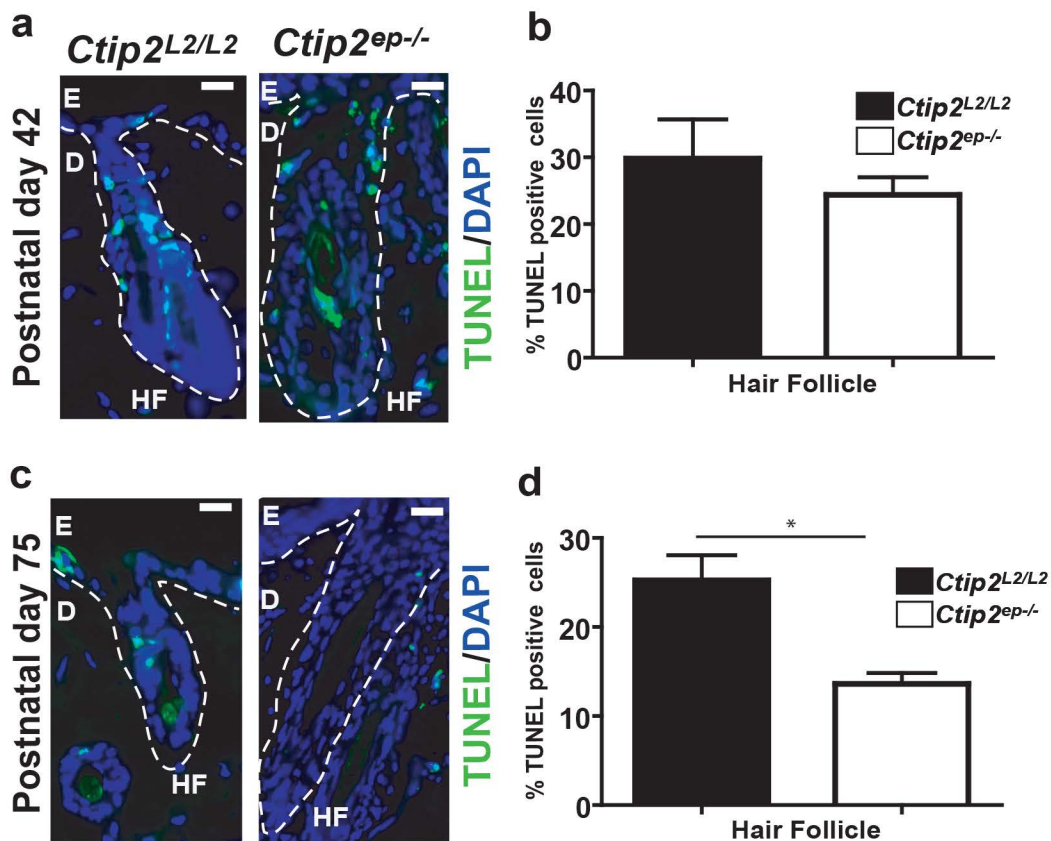

**Supplementary Figure 5. Ablation of *Ctip2* from epidermis and hair follicle lead to altered cell survival specifically in HF**

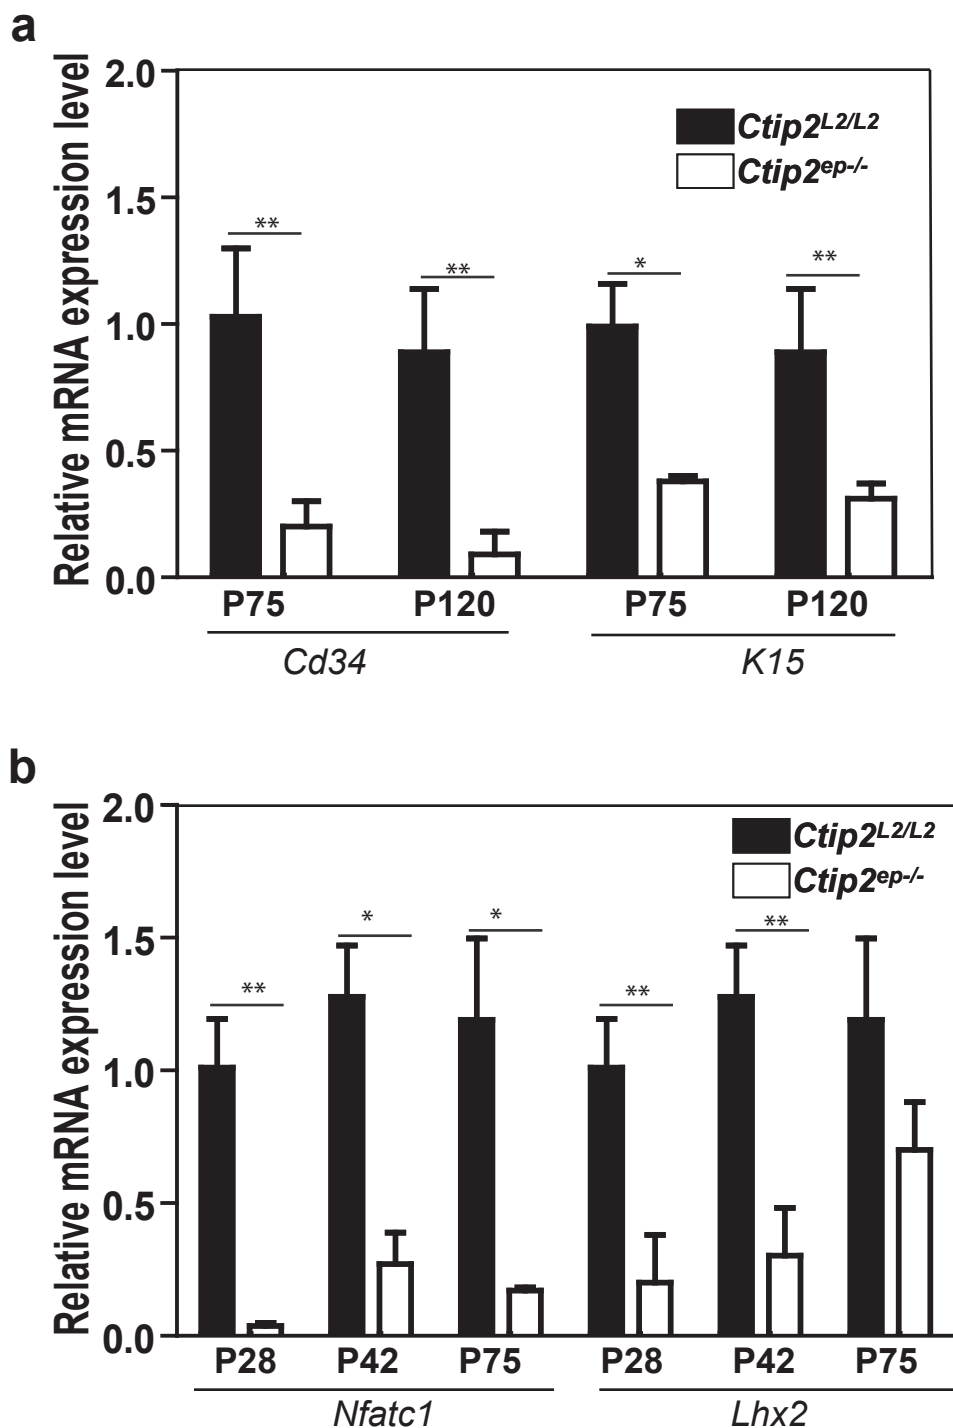

**Supplementary Figure 6. Expression of genes encoding stem cell markers and regulators of hair cycling in adult mice skin**

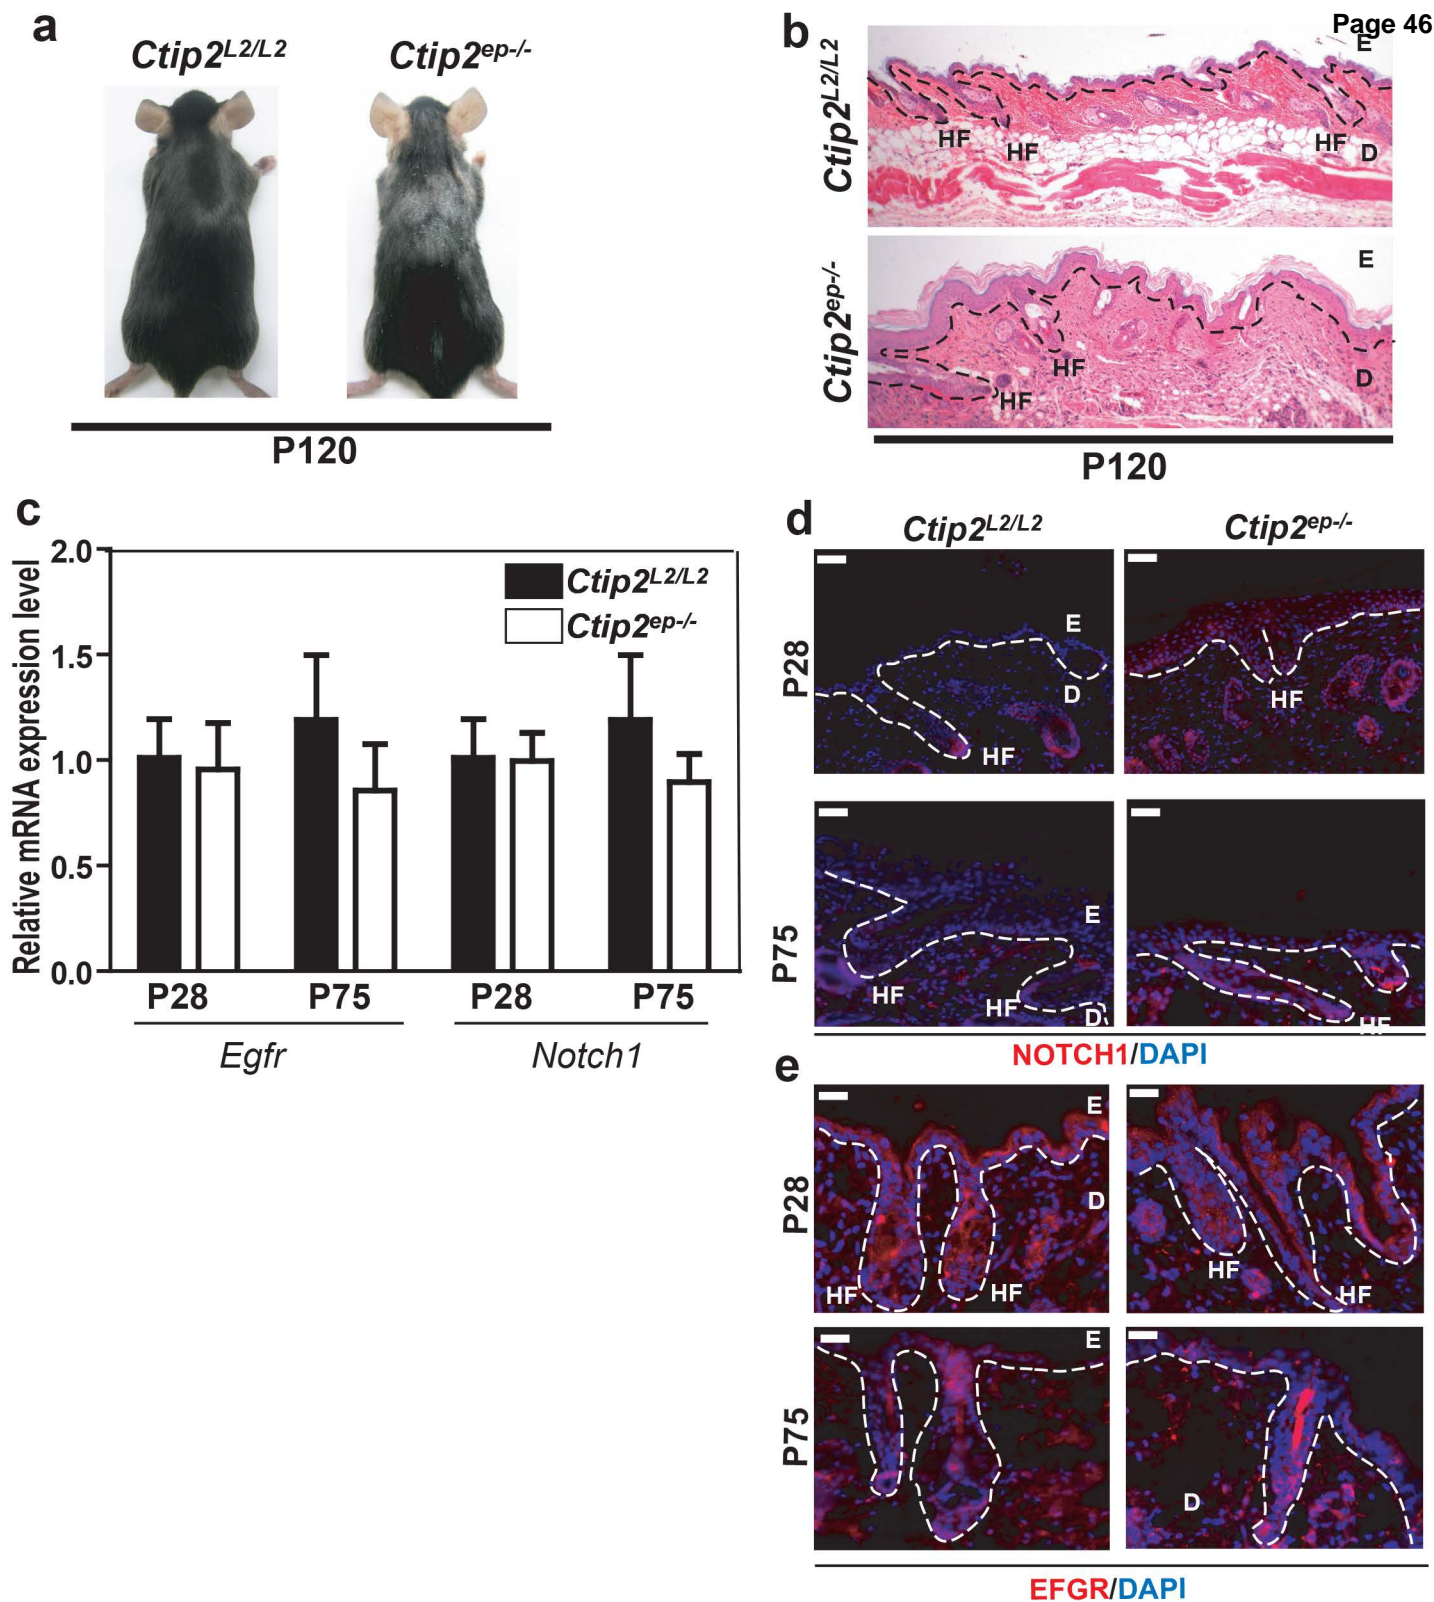

Supplementary Figure 7. Loss of hair coat in *Ctip2*<sup>ep-/-</sup> mice and expression of factors involved in hair cycling in the *Ctip2*<sup>ep-/-</sup> skin

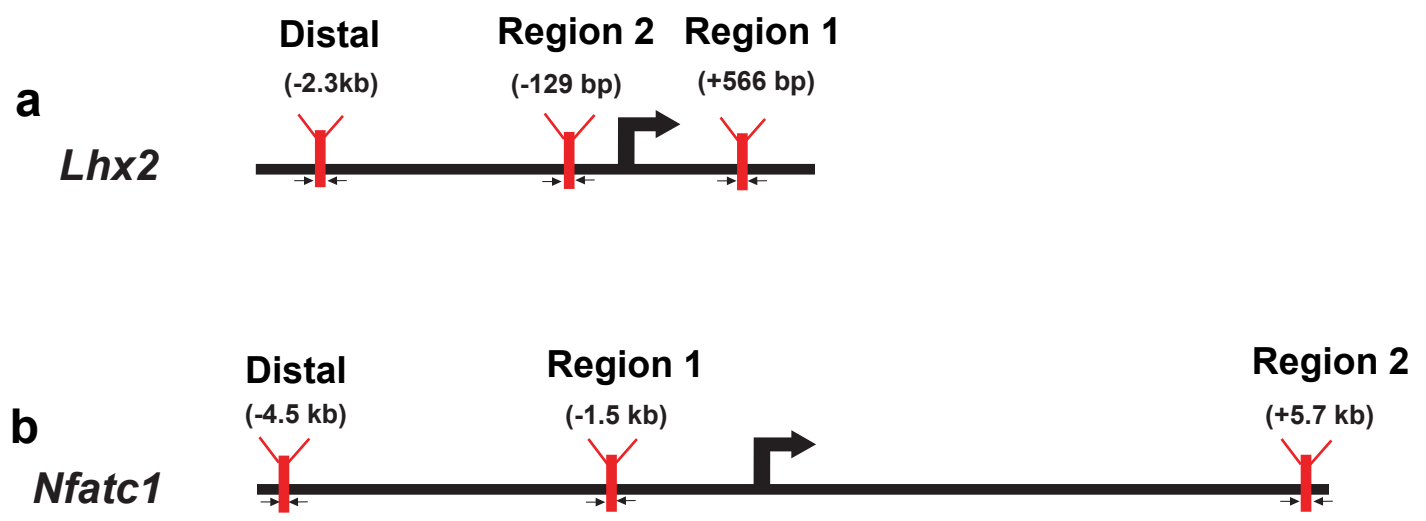

Supplementary Figure 8. Schematic diagram indicating binding region of CTIP2 on the *Lhx2* and *Nfatc1* promoters



**Table S1. List of antibodies**

| <b>Antibody</b> | <b>Species</b> | <b>Source/Company</b>       | <b>Dilution</b> |
|-----------------|----------------|-----------------------------|-----------------|
| anti-BrdU       | Rat            | Serotec                     | 1:200           |
| anti-CTIP2      | Rat            | Abcam                       | 1:300           |
| anti-EGFR       | Rabbit         | Cell Signaling              | 1:200           |
| anti-NOTCH1     | Rabbit         | Cell Signaling              | 1:400           |
| anti- LHX2      | Goat           | Santa Cruz<br>Biotechnology | 1:100           |
| anti-NFATC1     | Mouse          | Santa Cruz<br>Biotechnology | 1:200           |
| anti-CD34       | Rabbit         | Santa Cruz<br>Biotechnology | 1:200           |
| anti-K15        | Chicken        | Covance                     | 1:500           |
| anti-K6hf       | Guinea Pig     | Progen                      | 1:200           |

Table S2. List of Primers for RT-qPCR

| <b>Gene</b>   | <b>Strand</b> | <b>Primer Sequences</b>          |
|---------------|---------------|----------------------------------|
| <i>Bmp2</i>   | Forward       | 5' – GGACCCGCTGTCTTCTAGTG – 3'   |
|               | Reverse       | 5' – GTCTCTGCTTCAGGCCAAAC – 3'   |
| <i>Cd34</i>   | Forward       | 5' – AGACTCAGGGAAAGGCCAAT – 3'   |
|               | Reverse       | 5' – TTCTGTGTCAGCCACCACAT – 3'   |
| <i>Egfr</i>   | Forward       | 5' – GCCATCTGGGCCAAAGATACC – 3'  |
|               | Reverse       | 5' – GTCTTCGCATGAATAGGCCAAT – 3' |
| <i>K15</i>    | Forward       | 5' – AGCTTTGGTGGAGGGAGTCT – 3'   |
|               | Reverse       | 5' – ACCAAAGCCACAACCTCATGC – 3'  |
| <i>Lhx2</i>   | Forward       | 5' – CTGTTCCACAGTCTGTCGGG – 3'   |
|               | Reverse       | 5' – CAGCAGGTAGTAGCGGTCAG – 3'   |
| <i>Nfatc1</i> | Forward       | 5' – GCACATTTGAGTCCGTGATG – 3'   |
|               | Reverse       | 5' – GCAGAGCAAATGACTGTGGA – 3'   |
| <i>Notch1</i> | Forward       | 5' – TCAATGCCGTGGATGACCTA – 3'   |
|               | Reverse       | 5' – CCTTGTTGGCTCCGTTCTTC – 3'   |
| <i>Shh</i>    | Forward       | 5' – AAGCAGGTTTCGACTGGGTC – 3'   |
|               | Reverse       | 5' – CCGGGACGTAAGTCCTTCAC – 3'   |
| <i>Sox9</i>   | Forward       | 5' – ATAAGTTCCCCGTGTGCATC – 3'   |
|               | Reverse       | 5' – TACTGGTCTGCCAGCTTCCT – 3'   |
| <i>Tcf3</i>   | Forward       | 5' – GTCACCACAGGGCTGTCTCT – 3'   |
|               | Reverse       | 5' – CATGCTGAAGTCCAGGAGGT – 3'   |
| <i>Wnt10b</i> | Forward       | 5' – CCTTAAACTTCCCCGGTGAGC – 3'  |
|               | Reverse       | 5' – TGGTGCTGACACTCGTGAAC – 3'   |

Table S3. List of primers used for ChIP

| Gene and location                 | Region   | Strand  | Sequence                        |
|-----------------------------------|----------|---------|---------------------------------|
| <i>Lhx2</i> (-2.38 to -2.28kb)    | Distal   | Forward | 5' – TGGTAGGGAGGTAGGCAGTG – 3'  |
|                                   |          | Reverse | 5' – AGGGGTAAAGCACCCCTCAGT – 3' |
| <i>Lhx2</i> (+517 to +616bp)      | Proximal | Forward | 5' – CCTACTCCAGTTCGCCTTTG – 3'  |
|                                   |          | Reverse | 5' – GGTCACCCAGGAACAGCTA – 3'   |
| <i>Lhx2</i> (3'UTR)               | 3' UTR   | Forward | 5' – GGTATTTGCCTGCCTACCAA – 3'  |
|                                   |          | Reverse | 5' –TCAAGTGCAAGACCTGGATG – 3'   |
| <i>Nfact1</i> (-4.6 to -4.5kb)    | Distal   | Forward | 5' – GAAAACCTTTGGGCAGTGAG – 3'  |
|                                   |          | Reverse | 5' – GAAGCAAAGGAAGGGAGGT – 3'   |
| <i>Nfatc1</i> (-1.56 to -1.46 kb) | Proximal | Forward | 5' – CCATCCTCTCAAAGCCAGAG – 3'  |
|                                   |          | Reverse | 5' – ATGTCTCAGGCGCACTACCT – 3'  |
| <i>Nfact1</i> (3'UTR)             | 3' UTR   | Forward | 5' – TGCTGGGCAGTCTATGTGAG – 3'  |
|                                   |          | Reverse | 5' – GAAACAGCCAGAGCCATGTT – 3'  |

Table S4. List of primers used for Promoter Cloning for Luciferase Assay

| Gene and location                 | Region   | Strand  | Sequence                                               |
|-----------------------------------|----------|---------|--------------------------------------------------------|
| <i>Lhx2</i><br>(-399 to +618bp)   | Proximal | Forward | 5' – AGATCTA <b>ACGCGT</b> TGCACGTACATGGGAGAGAG – 3'   |
|                                   |          | Reverse | 5' – TGAGACCTA <b>AAGCTT</b> GGTTCACCCAGGAACAGCTA – 3' |
| <i>Nfatc1</i><br>(-3.2 to -1.1kb) | Proximal | Forward | 5' – ACTACTAGGT <b>ACCC</b> CAGGTGAGGTAACAGGAG – 3'    |
|                                   |          | Reverse | 5' – CTTACAT <b>GCTAGC</b> GGTTGGGCAGTTAGAACGTC – 3'   |

Note: Black is the part of the respective gene sequence.

Green is the restriction digestion site for particular restriction enzyme.

Blue is additional nucleotide for optimal restriction digestion
